# Supplementary material for: Photocatalytic CO2conversion over alkali modified TiO2without loading noble metal cocatalyst
Source: Royal Society of Chemistry journal article supplement (doi:10.1039/c4cc04848b), 2014-08-06
Supplement: c4cc04848b1.pdf [file c4cc04848b1.pdf]

## Electronic Supporting Information

### Photocatalytic CO<sub>2</sub> conversion over alkali modified TiO<sub>2</sub> without loading noble metal cocatalyst

Xianguang Meng<sup>ab</sup>, Shuxin Ouyang<sup>ac</sup>, Tetsuya Kako<sup>ab</sup>, Peng Li<sup>a</sup>, Qing Yu<sup>ab</sup>, Tao Wang<sup>\*a</sup>, and Jinhua Ye<sup>\*abc</sup>

<sup>a</sup> Environmental Remediation Materials Unit and International Center for Materials Nanoarchitectonics (WPI-MANA), 1-1 Namiki, Tsukuba, Ibaraki 305-0044 (Japan)

<sup>b</sup> Graduate School of Chemical Science and Engineering, Hokkaido University, Sapporo 060-0814 (Japan)

<sup>c</sup> TU-NIMS Joint Research Center, School of Material Science and Engineering, Tianjin University, 92 Weijin Road, Tianjin (P.R. China)

E-mail:

WANG.Tao@nims.go.jp

jinhua.ye@nims.go.jp

**Sample preparation:**

TiO<sub>2</sub> (commercial ST01, anatase form, mean particle size: 5 nm) powder was pretreated at 200 °C in air for 1 hour before loading NaOH. NaOH-TiO<sub>2</sub> composites were prepared by the impregnation of TiO<sub>2</sub> in aqueous solution (10 ml) containing quantitative NaOH (1, 3, 5, and 7 wt%). The suspensions were sonicated to fully disperse TiO<sub>2</sub> nanoparticles and then dried in a vacuum drying oven at 70 °C.

**Reaction condition and activity evaluation:**

The gas phase photoreduction reaction was carried out in a closed circulation system equipped with a vacuum line. The NaOH-TiO<sub>2</sub> photocatalyst (0.08 g) was dispersed uniformly on a quartz fiber filter with the area of 7 cm<sup>2</sup>. The quartz fiber filter film is fixed on the stage inside the reaction cell. 2 ml of water was injected into the system as reducer. The system was vacuumed and then 80 kPa of CO<sub>2</sub> was introduced. A 300 W Xe lamp was employed as light source.

The contents of CO<sub>2</sub>, CO and CH<sub>4</sub> in the reaction system were sampled and measured with a gas chromatograph (GC-14B, Shimadzu) equipped with a flame ionization detector (FID) according to the standard curves. The contents of H<sub>2</sub> were measured with an online gas chromatograph (GC-8A, Shimadzu) with a TCD detector according to the standard curve. Isotope experiments were performed by gas chromatography-mass spectrometry (GC-MS, JMS-K9, JEOL Co., Japan). The apparent quantum efficiency was calculated as following equation,

$$AQE = N(\text{CH}_4) \times 8 / N(\text{Photons}) \times 100\%$$

in which  $N(\text{CH}_4)$  and  $N(\text{Photons})$  signify the molecular number of generated CH<sub>4</sub> in unit time and the number of incident photons in unit time, respectively.

**Sample characterization:**

X-ray diffraction (XRD) patterns were recorded on an X-Pert diffractometer equipped with graphite monochromatized Cu-K $\alpha$  radiation. The specific surface areas were determined with a surface area analyzer (BEL Sorp-II mini, BEL Japan Co., Japan) by the Brunauer-Emmett-Teller (BET) method. Transmission electron microscopy (TEM) images were taken by a field emission transmission electron microscope (2100F, JEOL Co., Japan) operated at 200 kV. The diffuse reflection spectra of catalysts were measured by UV-visible spectrophotometer (UV-2500PC, Shimadzu Co., Japan). Surface chemical analysis was performed by X-ray photoelectron spectroscopy (XPS, PHI Quantera SXM, ULVAC-PHI Inc., Japan). A Fourier transform-infrared (FT-IR) spectrophotometer (IR Prestige-21, Shimadzu Co., Japan) was utilized to obtain IR absorption spectra. In-situ FT-IR (FT-IR-6300, JASCO Inc.) measurement was carried out to investigate the mechanism of CO<sub>2</sub> conversion.

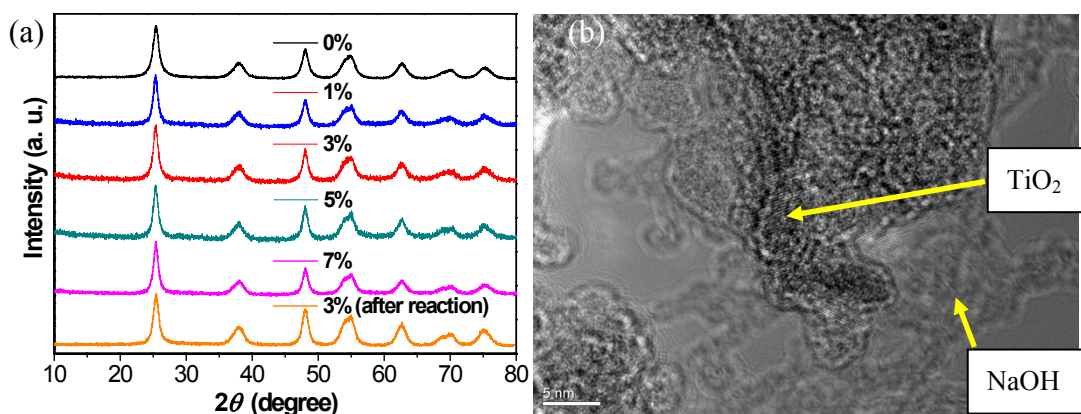

Fig. S1 (a) XRD patterns of  $\text{TiO}_2$  and  $\text{NaOH-TiO}_2$  composites; (b) TEM image of 3 wt%  $\text{NaOH-TiO}_2$  composite.

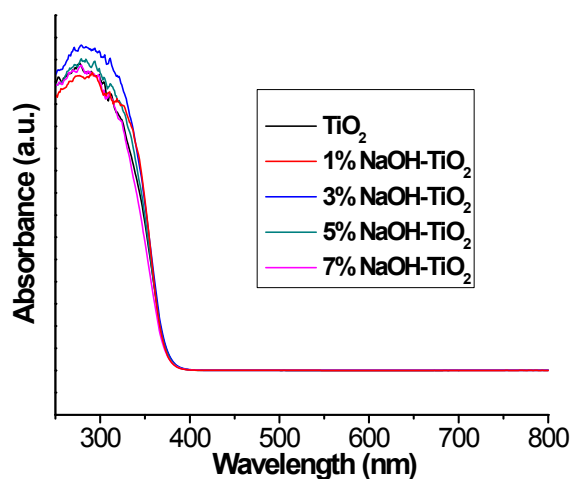

Fig. S2 UV-Vis diffused reflectance spectra of  $\text{TiO}_2$  and  $\text{NaOH-TiO}_2$  composites.

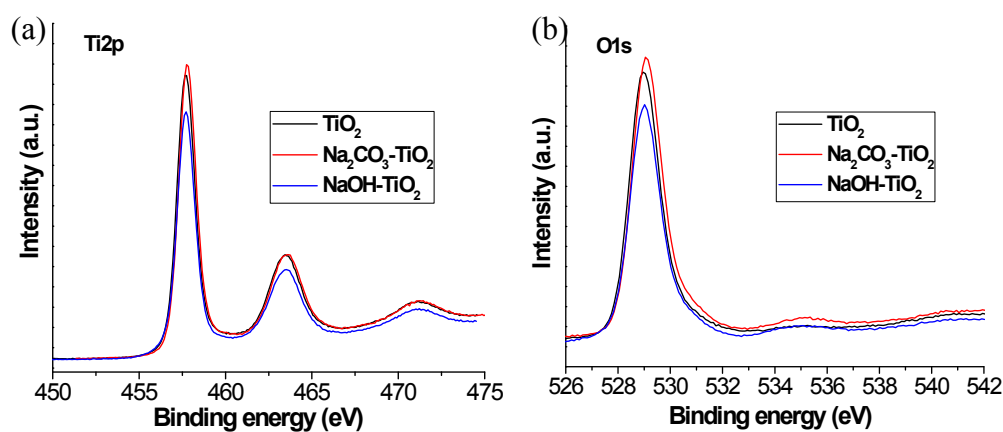

Fig. S3 XPS spectra of  $\text{TiO}_2$ , 3.975wt%  $\text{Na}_2\text{CO}_3\text{-TiO}_2$ , and 3 wt%  $\text{NaOH-TiO}_2$  composites. (a)  $\text{Ti}2p$  and (b)  $\text{O}1s$ .

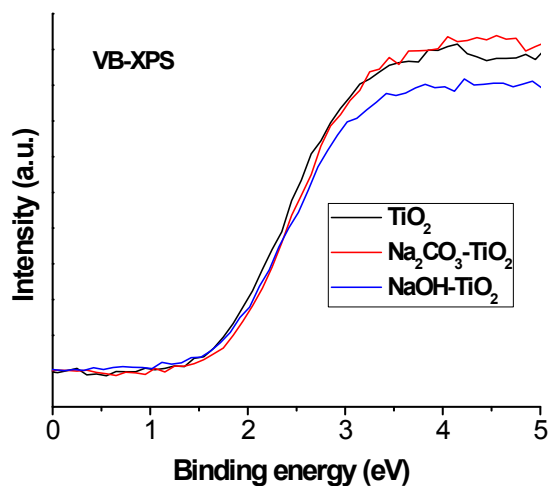

Fig. S4 Valence band-XPS of  $\text{TiO}_2$ , 3.975 wt%  $\text{Na}_2\text{CO}_3\text{-TiO}_2$ , and 3 wt%  $\text{NaOH-TiO}_2$  composites.

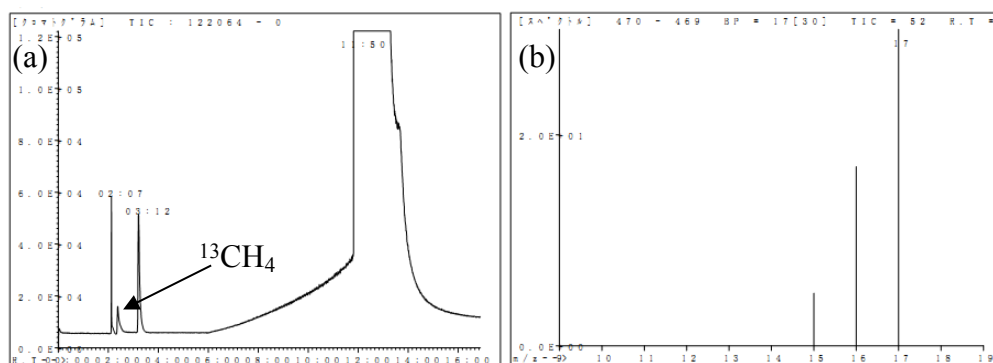

Fig. S5 (a) Gas chromatogram and (b) mass spectrum of  $^{13}\text{CH}_4$  produced over 3 wt%  $\text{NaOH-TiO}_2$  photocatalyst. Carbon dioxide  $^{13}\text{CO}_2$  was used.

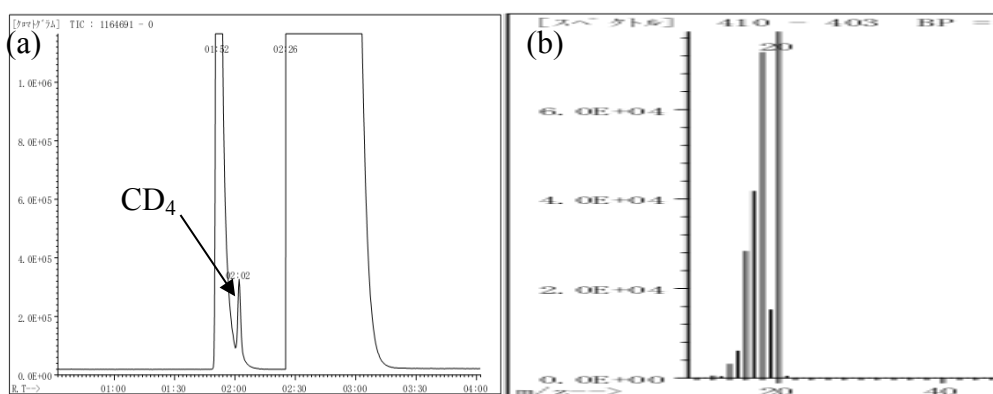

Fig. S6 (a) Gas chromatogram and (b) mass spectrum of  $\text{CD}_4$  produced over 3 wt%  $\text{NaOH-TiO}_2$  photocatalyst.  $\text{D}_2\text{O}$  water (purity 99.9%) was used.

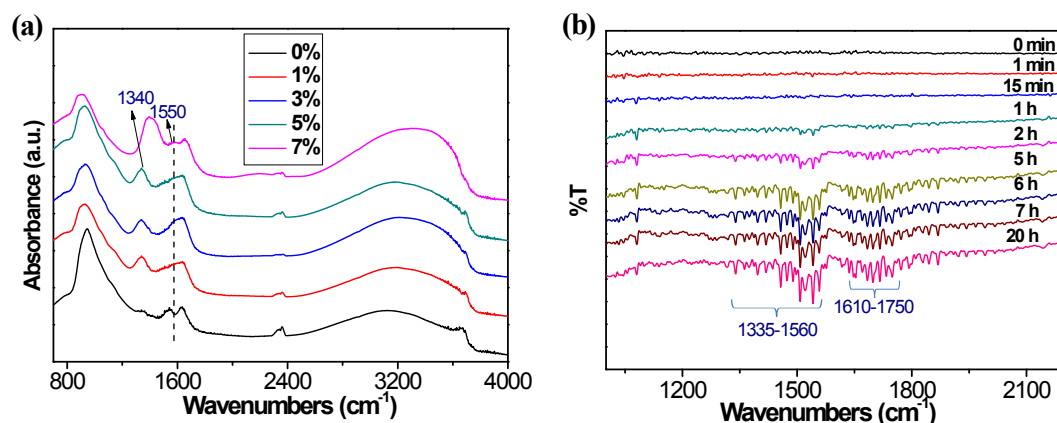

Fig. S7 (a) FT-IR spectra of NaOH-TiO<sub>2</sub> composites with different NaOH loading amount and (b) in-situ FT-IR spectra of CO<sub>2</sub> photoreduction over 3 wt% NaOH-TiO<sub>2</sub> photocatalyst at different irradiation times. The in-situ FT-IR spectra were measured in the presence of H<sub>2</sub>O and CO<sub>2</sub> atmosphere under the irradiation from a 300W Xe lamp.

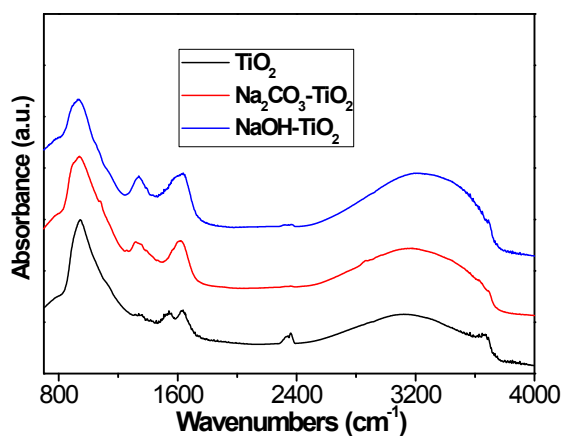

Fig. S8 FT-IR spectra of 3 wt% NaOH-TiO<sub>2</sub> and 3.975 wt% Na<sub>2</sub>CO<sub>3</sub>-TiO<sub>2</sub> composites (OH stretch region 2800-3500 cm<sup>-1</sup>).

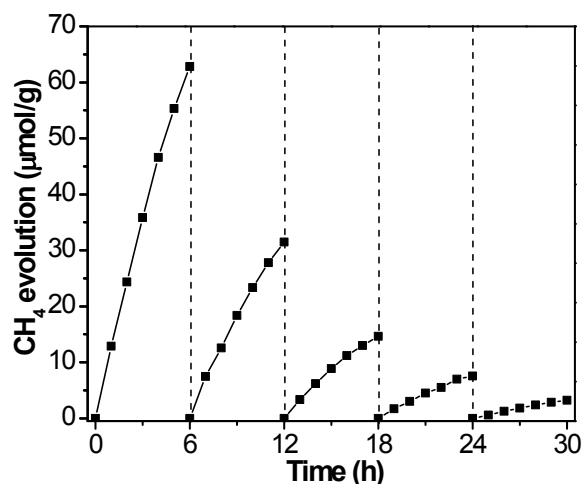

Fig. S9 cycle performance of 3 wt% NaOH-TiO<sub>2</sub> photocatalyst.

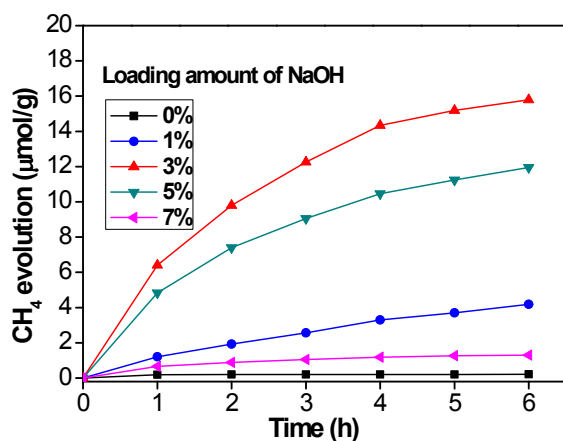

Fig. S10 Time course of  $\text{CH}_4$  evolution over 1 wt% Pt-NaOH- $\text{TiO}_2$  photocatalysts.

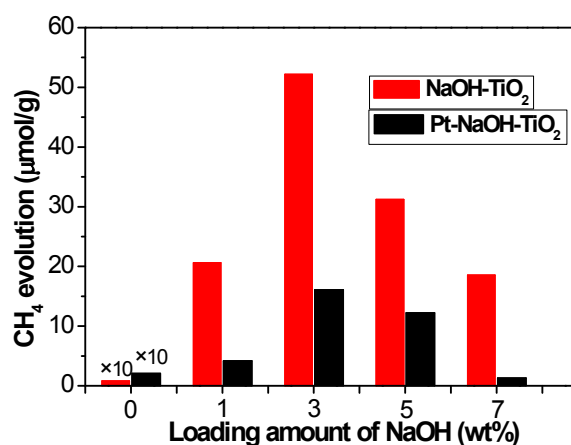

Fig. S11 Evolution amounts of  $\text{CH}_4$  over NaOH- $\text{TiO}_2$  and 1 wt% Pt-NaOH- $\text{TiO}_2$  in the first 6 hours' irradiation from photocatalytic  $\text{CO}_2$  conversion. The loading of 1 wt% Pt on  $\text{TiO}_2$  was prepared by photodeposition method in aqueous solution containing  $\text{H}_2\text{PtCl}_6$  and methanol. The obtained Pt- $\text{TiO}_2$  was heated at  $200^\circ\text{C}$  in air for 1 hour to remove the methanol. Finally, Pt- $\text{TiO}_2$  was impregnated in NaOH solutions.
